# Supplementary material
Source: PubMed Central journal article supplement (PMC4548326)
Supplement: ajcr0005-2139-f6.pdf [file ajcr0005-2139-f6.pdf]

## Evofosfamide and mTOR inhibitors

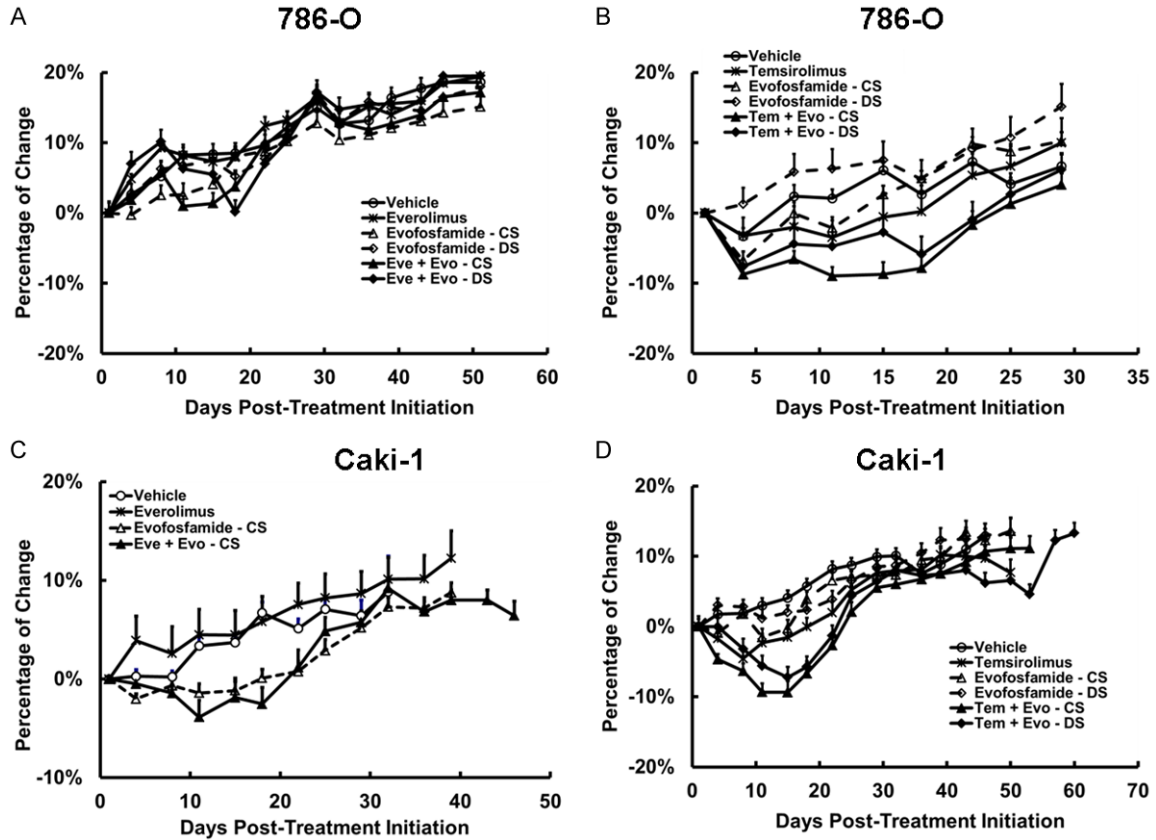

**Supplementary Figure 1.** Body weight change of evofosfamide in combination with mTOR inhibitors in the 786-O and Caki-1 xenograft model. Combination treatment in Concurrent Schedule and Delayed Schedule was tested. Animals were monitored daily and body weight change were quantified twice a week. Data are expressed as Mean  $\pm$  SEM of 10 animals per group. Evo, evofosfamide; Eve, everolimus; Tem, temsirolimus; CS, Concurrent Schedule; and DS, Delayed Schedule.

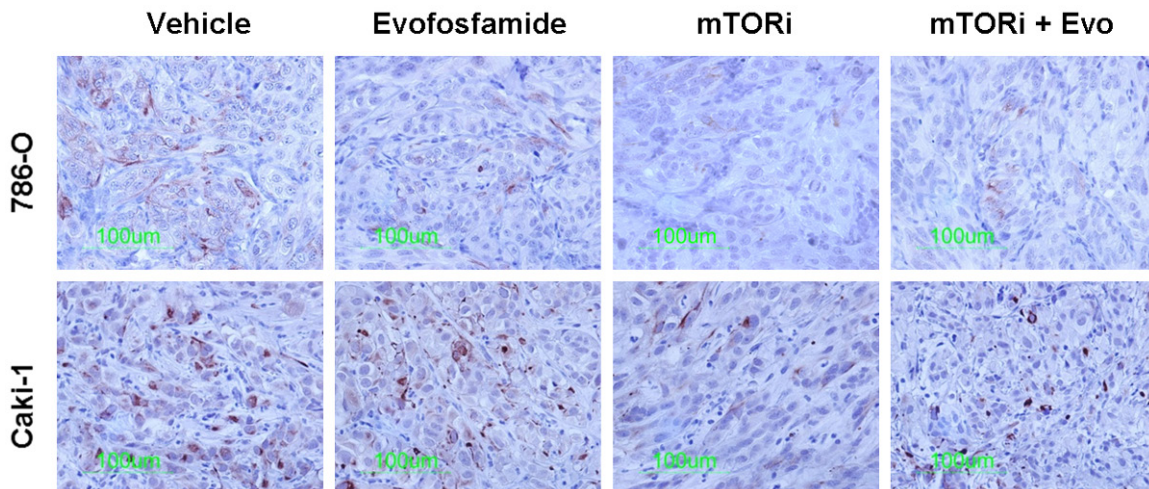

**Supplementary Figure 2.** Effect of mTOR inhibitor on phosphorylated mTOR protein (p-mTOR) expression detected by p-mTOR protein immunostaining. Rabbit polyclonal p-mTOR protein (Cell Signaling, 1:10) was used as a primary antibody. Everolimus and temsirolimus were used in the 786-O and Caki-1 xenografts, respectively. Evo, evofosfamide; and mTORi, mTOR inhibitor.
